# Supplementary material for: COVID-19 among adults living with HIV: Correlates of mortality in a general population in a resource-limited setting
Source: bioRxiv or medRxiv preprint supplement (doi:10.1101/2022.10.17.22281085), 2022-10-17
Supplement: Supplementary file [file media-1.pdf]

# Supplemental Digital Content

## Additional analysis outputs for:

COVID-19 among adults living with HIV: Correlates of mortality in a general population in a resource-limited setting

Reshma Kassanjee<sup>1§</sup>, Mary-Ann Davies<sup>1,2</sup>, Olina Ngwenya<sup>3</sup>, Richard Osei-Yeboah<sup>4</sup>, Theuns Jacobs<sup>1,2</sup>, Erna Morden<sup>1,2</sup>, Venessa Timmerman<sup>2</sup>, Stefan Britz<sup>5</sup>, Marc Mendelson<sup>6</sup>, Jantjie Taljaard<sup>7</sup>, Julien Riou<sup>8</sup>, Andrew Boulle<sup>1,2</sup>, Nicki Tiffin<sup>2,9</sup>, Nesbert Zinyakatira<sup>1,2</sup>

- 1 School of Public Health, University of Cape Town, Cape Town, South Africa
- 2 Western Cape Government: Health and Wellness, Cape Town, South Africa
- 3 Wellcome Centre for Infectious Disease Research in Africa, Institute of Infectious Diseases and Molecular Medicine, University of Cape Town, Cape Town, South Africa
- 4 Division of Computational Biology, Integrative Biomedical Sciences Department, Faculty of Health Sciences, University of Cape Town, Cape Town, South Africa
- 5 Department of Statistical Sciences, University of Cape Town, Cape Town, South Africa
- 6 Division of Infectious Diseases and HIV Medicine, Department of Medicine, Groote Schuur Hospital, University of Cape Town, South Africa
- 7 Division of Infectious Diseases, Department of Medicine, Tygerberg Hospital, Stellenbosch University, South Africa
- 8 Institute of Social and Preventive Medicine, University of Bern, Bern, Switzerland
- 9 University of the Western Cape, Cape Town, South Africa

§ Corresponding author: Reshma Kassanjee  
Reshma.Kassanjee@uct.ac.za

---

|                                                                                            |    |
|--------------------------------------------------------------------------------------------|----|
| A: Additional descriptions of SARS-CoV-2 infections                                        | 2  |
| B: Unadjusted and adjusted odds ratios for all model terms                                 | 4  |
| C: Adjusted odds ratios using alternative CD4 cell counts measures                         | 8  |
| D: Adjusted odds ratios for models including SARS-CoV-2 infections diagnosed during Wave 4 | 12 |

---

# Supplemental Digital Content A: Additional descriptions of SARS-CoV-2 infections

**Table A1: Admission pressure, timing and location for SARS-CoV-2 infections among adults with HIV in the Western Cape, stratified by age group (percentages and counts)**

| Characteristic                            | Cases until end of Wave 3     |                             |                        | All cases (including Wave 4) |
|-------------------------------------------|-------------------------------|-----------------------------|------------------------|------------------------------|
|                                           | Ages 15-39 years<br>n = 9,321 | Ages ≥40 years<br>n = 8,799 | All ages<br>n = 18,120 | All ages<br>n = 22,057       |
| <b>Admission pressure<sup>1</sup> (%)</b> |                               |                             |                        |                              |
| <25                                       | 28.7 (2,674)                  | 23.5 (2,070)                | 26.2 (4,744)           | 29.2 (6,432)                 |
| ≥25 and <50                               | 34.1 (3,181)                  | 36.5 (3,208)                | 35.3 (6,389)           | 37.8 (8,346)                 |
| ≥50                                       | 37.2 (3,466)                  | 40.0 (3,521)                | 38.6 (6,987)           | 33.0 (7,279)                 |
| <b>Wave</b>                               |                               |                             |                        |                              |
| Wave 1                                    | 32.7 (3,052)                  | 31.0 (2,731)                | 31.9 (5,783)           | 26.2 (5,783)                 |
| Wave 2                                    | 26.5 (2,469)                  | 28.8 (2,532)                | 27.6 (5,001)           | 22.7 (5,001)                 |
| Wave 3                                    | 29.3 (2,731)                  | 31.2 (2,747)                | 30.2 (5,478)           | 24.8 (5,478)                 |
| Wave 4                                    | -                             | -                           | -                      | 15.6 (3,430)                 |
| Inter-waves                               | 11.5 (1,069)                  | 9.0 (789)                   | 10.3 (1,858)           | 10.7 (2,365)                 |
| <b>District</b>                           |                               |                             |                        |                              |
| Cape Winelands                            | 9.8 (915)                     | 10.8 (950)                  | 10.3 (1,865)           | 10.2 (2,253)                 |
| Central Karoo                             | 1.1 (106)                     | 1.4 (124)                   | 1.3 (230)              | 1.3 (277)                    |
| City of Cape Town                         | 61.1 (5,698)                  | 62.7 (5,518)                | 61.9 (11,216)          | 62.1 (13,707)                |
| Garden Route                              | 18.0 (1,677)                  | 16.1 (1,416)                | 17.1 (3,093)           | 17.2 (3,792)                 |
| Overberg                                  | 5.2 (489)                     | 4.3 (379)                   | 4.8 (868)              | 4.6 (1,009)                  |
| West Coast                                | 4.7 (436)                     | 4.7 (412)                   | 4.7 (848)              | 4.6 (1,019)                  |

<sup>1</sup> The week's total number of COVID-19 admissions relative to the maximum weekly COVID-19 admissions for that district (as a percent).

**Table A2: Alternative CD4 cell count measures for SARS-CoV-2 infections among adults with HIV in the Western Cape, stratified by age group (percentages and counts)**

| CD4 count (cells/μl) measure | Cases until end of Wave 3     |                             |                        | All cases (including Wave 4) |
|------------------------------|-------------------------------|-----------------------------|------------------------|------------------------------|
|                              | Ages 15-39 years<br>n = 9,321 | Ages ≥40 years<br>n = 8,799 | All ages<br>n = 18,120 | All ages<br>n = 22,057       |
| <b>Recent</b>                |                               |                             |                        |                              |
| ≥ 500                        | 14.0 (1,304)                  | 11.3 (991)                  | 12.7 (2,295)           | 12.6 (2,775)                 |
| 200-499                      | 15.7 (1,465)                  | 11.5 (1,014)                | 13.7 (2,479)           | 13.5 (2,986)                 |
| 50-199                       | 7.0 (648)                     | 5.8 (511)                   | 6.4 (1,159)            | 7.1 (1,576)                  |
| 0-49                         | 3.6 (333)                     | 2.2 (191)                   | 2.9 (524)              | 3.5 (773)                    |
| Unknown                      | 59.8 (5,571)                  | 69.2 (6,092)                | 64.4 (11,663)          | 63.2 (13,947)                |
| <b>Nadir</b>                 |                               |                             |                        |                              |
| ≥ 500                        | 15.3 (1,424)                  | 12.1 (1,067)                | 13.7 (2,491)           | 13.4 (2,965)                 |
| 200-499                      | 44.1 (4,109)                  | 39.2 (3,446)                | 41.7 (7,555)           | 40.7 (8,986)                 |
| 50-199                       | 21.3 (1,987)                  | 28.7 (2,526)                | 24.9 (4,513)           | 25.1 (5,535)                 |
| 0-49                         | 8.0 (743)                     | 10.1 (886)                  | 9.0 (1,629)            | 9.6 (2,112)                  |
| Unknown                      | 11.4 (1,058)                  | 9.9 (874)                   | 10.7 (1,932)           | 11.1 (2,459)                 |
| <b>At ART initiation</b>     |                               |                             |                        |                              |
| ≥ 500                        | 11.9 (1,105)                  | 7.2 (631)                   | 9.6 (1,736)            | 9.6 (2,111)                  |
| 200-499                      | 34.0 (3,166)                  | 25.5 (2,245)                | 29.9 (5,411)           | 29.8 (6,572)                 |
| 50-199                       | 14.9 (1,387)                  | 19.9 (1,752)                | 17.3 (3,139)           | 17.3 (3,813)                 |
| 0-49                         | 3.8 (358)                     | 5.4 (477)                   | 4.6 (835)              | 4.7 (1,027)                  |
| Unknown                      | 35.5 (3,305)                  | 42.0 (3,694)                | 38.6 (6,999)           | 38.7 (8,534)                 |

**Table A3: Outcomes, demographic characteristics, co-existing conditions, vaccination status and HIV characteristics, for SARS-CoV-2 infections among adults with HIV in the Western Cape, stratified by wave (percentages and counts)**

| Characteristic / Outcome                        | Wave 1<br>n = 5,783 | Wave 2<br>n = 5,001 | Wave 3<br>n = 5,478 | Wave 4<br>n = 3,430 | Inter-wave<br>n = 2,361 |
|-------------------------------------------------|---------------------|---------------------|---------------------|---------------------|-------------------------|
| <b>Death</b>                                    | 5.6 (323)           | 5.6 (281)           | 5.9 (325)           | 4.9 (167)           | 5.8 (137)               |
| <b>Sex</b>                                      |                     |                     |                     |                     |                         |
| Female                                          | 75.2 (4,351)        | 70.3 (3,515)        | 67.2 (3,681)        | 68.9 (2,364)        | 69.8 (1,650)            |
| Male                                            | 24.8 (1,432)        | 29.7 (1,486)        | 32.8 (1,797)        | 31.1 (1,066)        | 30.2 (715)              |
| <b>Age (years)</b>                              | 0                   | 0                   | 0                   | 0                   | 0                       |
| 15-24                                           | 4.8 (279)           | 4.1 (204)           | 5.1 (277)           | 4.7 (161)           | 7.8 (185)               |
| 25-29                                           | 11.3 (655)          | 10.9 (544)          | 10.3 (566)          | 12.7 (435)          | 13.4 (317)              |
| 30-34                                           | 17.5 (1,012)        | 16.6 (830)          | 15.9 (872)          | 20.3 (695)          | 18.3 (432)              |
| 35-39                                           | 19.1 (1,106)        | 17.8 (891)          | 18.5 (1,016)        | 19.5 (669)          | 18.9 (448)              |
| 40-49                                           | 28.7 (1,657)        | 29.7 (1,486)        | 30.2 (1,653)        | 26.1 (894)          | 26.1 (618)              |
| 50-59                                           | 13.7 (792)          | 14.8 (742)          | 15.0 (822)          | 12.2 (419)          | 11.9 (282)              |
| 60-69                                           | 3.9 (225)           | 4.7 (233)           | 4.0 (217)           | 3.7 (127)           | 2.6 (62)                |
| ≥70                                             | 1.0 (57)            | 1.4 (71)            | 1.0 (55)            | 0.9 (30)            | 0.9 (21)                |
| <b>Hypertension</b>                             | 21.2 (1,226)        | 21.2 (1,062)        | 20.0 (1,096)        | 16.3 (559)          | 17.6 (417)              |
| <b>Diabetes</b>                                 | 11.8 (684)          | 10.1 (506)          | 7.6 (418)           | 6.2 (212)           | 7.6 (179)               |
| <b>Chronic obstructive pulmonary disease</b>    | 5.9 (343)           | 7.7 (384)           | 8.1 (442)           | 10.6 (365)          | 7.6 (180)               |
| <b>Chronic kidney disease</b>                   | 4.0 (233)           | 3.7 (183)           | 3.4 (187)           | 2.8 (95)            | 3.6 (86)                |
| <b>Tuberculosis<sup>1</sup> (years since)</b>   |                     |                     |                     |                     |                         |
| Absent                                          | 72.2 (4,177)        | 71.7 (3,586)        | 67.5 (3,695)        | 60.8 (2,087)        | 64.4 (1,523)            |
| ≥ 1                                             | 21.5 (1,242)        | 21.3 (1,064)        | 23.8 (1,303)        | 23.3 (800)          | 21.2 (502)              |
| < 1                                             | 3.0 (174)           | 2.7 (136)           | 3.4 (187)           | 5.7 (194)           | 4.9 (115)               |
| Ongoing                                         | 3.3 (190)           | 4.3 (215)           | 5.3 (293)           | 10.2 (349)          | 9.5 (225)               |
| <b>Pregnancy (in women aged 15-49 years)</b>    | 7.1 (263)           | 7.5 (216)           | 7.0 (215)           | 8.1 (165)           | 11.7 (169)              |
| <b>Vaccination status<sup>2</sup></b>           |                     |                     |                     |                     |                         |
| None                                            | 100.0 (5,783)       | 100.0 (5,001)       | 88.8 (4,866)        | 54.4 (1,866)        | 94.9 (2,245)            |
| Early                                           | -                   | -                   | 5.5 (298)           | 1.7 (57)            | 1.0 (24)                |
| Janssen - 1 vaccine                             | -                   | -                   | 3.8 (207)           | 16.8 (577)          | 1.5 (35)                |
| Pfizer - 1 vaccine                              | -                   | -                   | 1.7 (91)            | 5.1 (174)           | 1.1 (26)                |
| Janssen - 2 vaccines                            | -                   | -                   | 0.0 (0)             | 3.9 (133)           | 0.2 (4)                 |
| Pfizer - 2 vaccines                             | -                   | -                   | 0.3 (16)            | 18.2 (623)          | 1.3 (31)                |
| <b>Number of previous SARS-CoV-2 diagnoses</b>  |                     |                     |                     |                     |                         |
| 0                                               | 100.0 (5,783)       | 98.4 (4,920)        | 96.9 (5,308)        | 87.8 (3,011)        | 97.0 (2,294)            |
| 1                                               | 0.0 (0)             | 1.6 (81)            | 3.0 (166)           | 11.8 (406)          | 2.9 (69)                |
| 2                                               | 0.0 (0)             | 0.0 (0)             | 0.1 (4)             | 0.4 (13)            | 0.1 (2)                 |
| <b>CD4 count (cells/ul)</b>                     |                     |                     |                     |                     |                         |
| ≥ 500                                           | 11.6 (670)          | 13.7 (684)          | 13.3 (729)          | 12.7 (437)          | 10.8 (255)              |
| 200-499                                         | 13.4 (775)          | 12.8 (642)          | 14.3 (783)          | 12.4 (426)          | 15.2 (360)              |
| 50-199                                          | 5.2 (301)           | 6.0 (300)           | 7.4 (407)           | 10.2 (349)          | 9.3 (219)               |
| 0-49                                            | 2.4 (140)           | 2.6 (132)           | 2.8 (152)           | 6.1 (210)           | 5.9 (139)               |
| Unknown                                         | 67.4 (3,897)        | 64.8 (3,243)        | 62.2 (3,407)        | 58.5 (2,008)        | 58.9 (1,392)            |
| <b>Viral load<sup>3</sup> (copies/ml)</b>       |                     |                     |                     |                     |                         |
| 0-999                                           | 74.7 (3,970)        | 72.7 (3,301)        | 69.7 (3,449)        | 59.7 (1,833)        | 64.4 (1,360)            |
| ≥ 1000                                          | 6.6 (352)           | 8.9 (405)           | 10.8 (532)          | 13.3 (407)          | 14.5 (307)              |
| Unknown                                         | 18.7 (991)          | 18.4 (837)          | 19.5 (966)          | 27.0 (830)          | 21.0 (444)              |
| <b>ART (years since most recent collection)</b> |                     |                     |                     |                     |                         |
| ≥ 2                                             | 49.6 (2,868)        | 41.2 (2,061)        | 45.9 (2,517)        | 49.9 (1,713)        | 41.7 (987)              |
| < 2                                             | 42.3 (2,445)        | 49.6 (2,482)        | 44.4 (2,430)        | 39.6 (1,357)        | 47.5 (1,124)            |
| No ART                                          | 8.1 (470)           | 9.2 (458)           | 9.7 (531)           | 10.5 (360)          | 10.7 (254)              |
| <b>HIV (years since first evidence)</b>         |                     |                     |                     |                     |                         |
| <1                                              | 8.0 (464)           | 6.9 (347)           | 6.3 (346)           | 8.8 (303)           | 10.4 (246)              |
| 1-5                                             | 31.7 (1,835)        | 32.0 (1,602)        | 29.3 (1,607)        | 29.3 (1,006)        | 32.8 (776)              |
| 5-10                                            | 34.9 (2,016)        | 34.8 (1,738)        | 37.0 (2,026)        | 35.7 (1,224)        | 32.9 (777)              |
| ≥ 10                                            | 25.4 (1,468)        | 26.3 (1,314)        | 27.4 (1,499)        | 26.2 (897)          | 23.9 (566)              |

<sup>1</sup> Time since the most recent evidence of a start of an episode; with episodes beginning after 2 months before the SARS-CoV-2 diagnosis considered as ongoing. <sup>2</sup> The highest level of protection from among six categories: No vaccine received ('None'); <28 days since a first vaccine dose ('Early'); ≥28 days since a first dose of a vaccine, by type ('1 vaccine'); or ≥14 days since a second dose, by type ('2 vaccines'). <sup>3</sup> Among those with evidence of ART at any time.

## Supplemental Digital Content B: Unadjusted and adjusted odds ratios for all model terms

**Table B1: Mortality rates, unadjusted and adjusted odds ratios (and 95% CIs) describing the association of mortality with a person's demographic characteristics, co-existing conditions, vaccination status, HIV characteristics and time/location covariates, for 15–39-year-old adults with HIV and SARS-CoV-2 infections in the Western Cape**

| Variable                                | Category       | n    | Mortality risk<br>(95% CI) | Univariable analysis: Unadjusted odds ratio (uOR) |         | Multivariable analysis: Adjusted odds ratio (aOR) |         |
|-----------------------------------------|----------------|------|----------------------------|---------------------------------------------------|---------|---------------------------------------------------|---------|
|                                         |                |      |                            | Estimate<br>(95% CI)                              | p-value | Estimate<br>(95% CI)                              | p-value |
| Sex                                     | Female (Ref)   | 7114 | 2.52 (2.16,2.91)           | -                                                 | <0.001  |                                                   | 0.656   |
|                                         | Male           | 2032 | 4.13 (3.31,5.09)           | 1.67 (1.28,2.17)                                  |         | 1.07 (0.80,1.42)                                  |         |
| Age group (years)                       | 15-24 (Ref)    | 884  | 2.26 (1.39,3.47)           | -                                                 | 0.001   |                                                   | 0.003   |
|                                         | 25-29          | 1973 | 2.13 (1.54,2.87)           | 0.94 (0.56,1.64)                                  |         | 1.21 (0.70,2.17)                                  |         |
|                                         | 30-34          | 3008 | 2.56 (2.03,3.19)           | 1.13 (0.70,1.92)                                  |         | 1.37 (0.83,2.38)                                  |         |
|                                         | 35-39          | 3281 | 3.78 (3.15,4.49)           | 1.70 (1.08,2.82)                                  |         | 2.05 (1.25,3.51)                                  |         |
| Hypertension                            | Absent (Ref)   | 8360 | 2.75 (2.41,3.12)           | -                                                 | 0.029   |                                                   | 0.019   |
|                                         | Present        | 786  | 4.20 (2.91,5.85)           | 1.55 (1.05,2.22)                                  |         | 1.68 (1.07,2.55)                                  |         |
| Diabetes                                | Absent (Ref)   | 8789 | 2.74 (2.41,3.11)           | -                                                 | 0.001   |                                                   | <0.001  |
|                                         | Present        | 357  | 6.16 (3.90,9.18)           | 2.33 (1.45,3.57)                                  |         | 2.64 (1.54,4.33)                                  |         |
| Chronic obstructive pulmonary disease   | Absent (Ref)   | 8776 | 2.83 (2.49,3.19)           | -                                                 | 0.19    |                                                   | 0.643   |
|                                         | Present        | 370  | 4.05 (2.29,6.60)           | 1.45 (0.82,2.39)                                  |         | 1.15 (0.62,1.98)                                  |         |
| Chronic kidney disease                  | Absent (Ref)   | 9062 | 2.74 (2.41,3.09)           | -                                                 | <0.001  |                                                   | <0.001  |
|                                         | Present        | 84   | 17.86 (10.35,27.74)        | 7.73 (4.20,13.32)                                 |         | 5.85 (2.93,11.06)                                 |         |
| Tuberculosis <sup>1</sup> (years since) | Absent (Ref)   | 6708 | 1.46 (1.19,1.78)           | -                                                 | <0.001  |                                                   | <0.001  |
|                                         | ≥ 1            | 1644 | 2.98 (2.21,3.92)           | 2.07 (1.45,2.92)                                  |         | 1.73 (1.19,2.49)                                  |         |
|                                         | < 1            | 319  | 13.17 (9.66,17.38)         | 10.23 (6.93,14.87)                                |         | 5.40 (3.43,8.41)                                  |         |
|                                         | Recent/current | 475  | 15.58 (12.44,19.16)        | 12.45 (9.03,17.09)                                |         | 7.40 (5.12,10.67)                                 |         |
| Number of conditions <sup>2</sup>       | 0-2 (Ref)      | 9076 | 2.81 (2.48,3.17)           | -                                                 | 0.001   |                                                   | 0.334   |
|                                         | >2             | 70   | 11.43 (5.07,21.28)         | 4.46 (1.96,8.88)                                  |         | 0.62 (0.22,1.60)                                  |         |
| Pregnancy                               | Absent (Ref)   | 8381 | 2.97 (2.62,3.36)           | -                                                 | 0.054   |                                                   | 0.842   |
|                                         | Present        | 765  | 1.83 (1.00,3.05)           | 0.61 (0.34,1.01)                                  |         | 0.94 (0.51,1.63)                                  |         |

Continued on next page

Table B1 continued

| Variable                            | Category                | n    | Mortality risk<br>(95% CI) | Univariable analysis: Unadjusted odds ratio (uOR) |         | Multivariable analysis: Adjusted odds ratio (aOR) |         |
|-------------------------------------|-------------------------|------|----------------------------|---------------------------------------------------|---------|---------------------------------------------------|---------|
|                                     |                         |      |                            | Estimate<br>(95% CI)                              | p-value | Estimate<br>(95% CI)                              | p-value |
| Vaccination status <sup>3</sup>     | None (Ref)              | 8967 | 2.90 (2.56,3.27)           |                                                   | 0.032   |                                                   | 0.081   |
|                                     | Early                   | 69   | 4.35 (0.91,12.18)          | 1.52 (0.37,4.13)                                  |         | 1.31 (0.31,3.80)                                  |         |
|                                     | 1/2 vaccines            | 110  | 0.00 (0.00,3.30)           | 0.00 (no deaths)                                  |         | 0.00 (0.00,0.29)                                  |         |
| CD4 count (cells/μl)                | ≥ 500 (Ref)             | 1280 | 1.48 (0.90,2.31)           | -                                                 | <0.001  |                                                   | <0.001  |
|                                     | 200-499                 | 1441 | 2.50 (1.76,3.44)           | 1.70 (0.98,3.04)                                  |         | 1.19 (0.67,2.17)                                  |         |
|                                     | 50-199                  | 631  | 7.77 (5.80,10.14)          | 5.59 (3.32,9.80)                                  |         | 2.20 (1.23,4.04)                                  |         |
|                                     | 0-49                    | 318  | 14.78 (11.07,19.17)        | 11.51 (6.76,20.38)                                |         | 3.39 (1.83,6.47)                                  |         |
|                                     | Unknown                 | 5476 | 2.05 (1.69,2.46)           | 1.39 (0.87,2.33)                                  |         | 1.05 (0.64,1.80)                                  |         |
| Viral load <sup>4</sup> (copies/ml) | 0-999 (Ref)             | 5546 | 1.77 (1.44,2.15)           | -                                                 | <0.001  |                                                   | 0.092   |
|                                     | ≥ 1000                  | 892  | 7.06 (5.47,8.95)           | 4.22 (3.04,5.83)                                  |         | 1.53 (1.03,2.24)                                  |         |
|                                     | Unknown                 | 1896 | 3.01 (2.28,3.88)           | 1.72 (1.23,2.39)                                  |         | 1.26 (0.88,1.81)                                  |         |
| ART collection                      | Yes                     | 8334 | 2.62 (2.28,2.98)           | -                                                 | <0.001  |                                                   | <0.001  |
|                                     | No ART                  | 812  | 5.54 (4.07,7.35)           | 2.18 (1.55,3.01)                                  |         | 2.30 (1.47,3.54)                                  |         |
| HIV (years since first evidence)    | ≥ 1 (Ref)               | 8322 | 2.66 (2.32,3.02)           | -                                                 | <0.001  |                                                   | 0.126   |
|                                     | < 1                     | 824  | 5.10 (3.70,6.83)           | 1.97 (1.39,2.73)                                  |         | 1.37 (0.91,2.05)                                  |         |
| Admission pressure <sup>5</sup> (%) | <25 (Ref)               | 2630 | 2.78 (2.18,3.48)           | -                                                 | 0.3     |                                                   | 0.036   |
|                                     | ≥25 and <50             | 3147 | 3.24 (2.65,3.92)           | 1.17 (0.87,1.60)                                  |         | 1.65 (1.11,2.49)                                  |         |
|                                     | ≥50                     | 3369 | 2.61 (2.10,3.21)           | 0.94 (0.69,1.29)                                  |         | 1.24 (0.79,2.00)                                  |         |
| Wave                                | Wave 1 (Ref)            | 3052 | 2.23 (1.73,2.82)           | -                                                 | 0.008   |                                                   | 0.022   |
|                                     | Wave 2                  | 2415 | 2.61 (2.01,3.33)           | 1.18 (0.83,1.66)                                  |         | 1.29 (0.82,2.01)                                  |         |
|                                     | Wave 3                  | 2636 | 3.57 (2.89,4.35)           | 1.62 (1.18,2.23)                                  |         | 1.68 (1.13,2.50)                                  |         |
|                                     | Inter-waves             | 1043 | 3.64 (2.59,4.97)           | 1.66 (1.10,2.47)                                  |         | 1.83 (1.08,3.11)                                  |         |
| District                            | City of Cape Town (Ref) | 5599 | 2.82 (2.40,3.29)           | -                                                 | 0.209   |                                                   | 0.136   |
|                                     | Cape Winelands          | 907  | 4.08 (2.89,5.58)           | 1.46 (1.00,2.09)                                  |         | 1.70 (1.12,2.52)                                  |         |
|                                     | Central Karoo           | 104  | 1.92 (0.23,6.77)           | 0.68 (0.11,2.16)                                  |         | 0.50 (0.08,1.75)                                  |         |
|                                     | Garden Route            | 1623 | 2.40 (1.71,3.27)           | 0.85 (0.59,1.20)                                  |         | 0.95 (0.64,1.37)                                  |         |
|                                     | Overberg                | 483  | 3.52 (2.06,5.58)           | 1.26 (0.73,2.03)                                  |         | 1.37 (0.76,2.32)                                  |         |
|                                     | West Coast              | 430  | 2.33 (1.12,4.24)           | 0.82 (0.40,1.49)                                  |         | 0.94 (0.45,1.75)                                  |         |

<sup>1</sup> Time since the most recent evidence of a start of an episode; with episodes beginning after 2 months before the SARS-CoV-2 diagnosis considered as ongoing. <sup>2</sup> Hypertension, diabetes, chronic obstructive pulmonary disease, chronic kidney disease, tuberculosis (at any time). <sup>3</sup> The highest level of protection from among: No vaccine received ('None'); <28 days since a first vaccine dose ('Early'); ≥28 days since (at least) a first dose of a vaccine (1 or 2 Pfizer or Janssen vaccines not distinguished due to small samples). <sup>4</sup> Among those with evidence of ART at any time. <sup>5</sup> The week's total number of COVID-19 admissions relative to the maximum weekly COVID-19 admissions for that district (as a percent). ART: Antiretroviral therapy. CI: Confidence interval.

**Table B2: Mortality rates, unadjusted and adjusted odds ratios (and 95% CIs) describing the association of mortality with a person’s demographic characteristics, co-existing conditions, vaccination status, HIV characteristics and time/location covariates, for adults with HIV and SARS-CoV-2 infections ≥ 40 years old in the Western Cape**

| Variable                                | Category       | n    | Mortality risk<br>(95% CI) | Univariable analysis: Unadjusted<br>odds ratio (uOR) |         | Multivariable analysis: Adjusted<br>odds ratio (aOR) |         |
|-----------------------------------------|----------------|------|----------------------------|------------------------------------------------------|---------|------------------------------------------------------|---------|
|                                         |                |      |                            | Estimate<br>(95% CI)                                 | p-value | Estimate<br>(95% CI)                                 | p-value |
| Sex                                     | Female (Ref)   | 5529 | 7.23 (6.57,7.95)           | -                                                    | <0.001  |                                                      | 0.002   |
|                                         | Male           | 3146 | 11.09 (10.02,12.24)        | 1.60 (1.38,1.86)                                     |         | 1.31 (1.11,1.54)                                     |         |
| Age group (years)                       | 40-49 (Ref)    | 5207 | 5.36 (4.76,6.00)           | -                                                    | <0.001  |                                                      | <0.001  |
|                                         | 50-59          | 2560 | 10.35 (9.20,11.60)         | 2.04 (1.71,2.43)                                     |         | 1.73 (1.43,2.09)                                     |         |
|                                         | 60-69          | 711  | 20.68 (17.75,23.84)        | 4.60 (3.70,5.72)                                     |         | 3.34 (2.61,4.26)                                     |         |
|                                         | ≥ 70           | 197  | 29.44 (23.18,36.34)        | 7.37 (5.27,10.20)                                    |         | 4.89 (3.35,7.07)                                     |         |
| Hypertension                            | Absent (Ref)   | 5796 | 6.82 (6.18,7.49)           | -                                                    | <0.001  |                                                      | 0.039   |
|                                         | Present        | 2879 | 12.30 (11.12,13.55)        | 1.92 (1.65,2.23)                                     |         | 1.22 (1.01,1.48)                                     |         |
| Diabetes                                | Absent (Ref)   | 7298 | 6.48 (5.93,7.07)           | -                                                    | <0.001  |                                                      | <0.001  |
|                                         | Present        | 1377 | 20.04 (17.96,22.26)        | 3.62 (3.08,4.25)                                     |         | 3.12 (2.54,3.83)                                     |         |
| Chronic obstructive pulmonary disease   | Absent (Ref)   | 7782 | 8.30 (7.70,8.94)           | -                                                    | 0.002   |                                                      | 0.744   |
|                                         | Present        | 893  | 11.53 (9.51,13.81)         | 1.44 (1.15,1.79)                                     |         | 1.04 (0.80,1.35)                                     |         |
| Chronic kidney disease                  | Absent (Ref)   | 8098 | 7.42 (6.86,8.01)           | -                                                    | <0.001  |                                                      | <0.001  |
|                                         | Present        | 577  | 25.65 (22.13,29.42)        | 4.30 (3.50,5.27)                                     |         | 2.47 (1.89,3.21)                                     |         |
| Tuberculosis <sup>1</sup> (years since) | Absent (Ref)   | 5799 | 7.23 (6.57,7.92)           | -                                                    | <0.001  |                                                      | <0.001  |
|                                         | ≥ 1            | 2284 | 8.89 (7.75,10.13)          | 1.25 (1.05,1.49)                                     |         | 1.26 (1.02,1.54)                                     |         |
|                                         | < 1            | 228  | 18.86 (14.00,24.55)        | 2.98 (2.09,4.18)                                     |         | 2.31 (1.54,3.42)                                     |         |
|                                         | Recent/current | 364  | 23.08 (18.85,27.75)        | 3.85 (2.95,4.99)                                     |         | 3.37 (2.46,4.59)                                     |         |
| Number of conditions <sup>2</sup>       | 0-2 (Ref)      | 7994 | 7.36 (6.79,7.95)           | -                                                    | <0.001  |                                                      | 0.074   |
|                                         | >2             | 681  | 23.64 (20.50,27.02)        | 3.90 (3.20,4.73)                                     |         | 0.74 (0.53,1.03)                                     |         |
| Pregnancy                               | Absent (Ref)   | 8625 | 8.66 (8.08,9.27)           | -                                                    | 0.195   |                                                      | 0.937   |
|                                         | Present        | 50   | 4.00 (0.49,13.71)          | 0.44 (0.07,1.42)                                     |         | 1.06 (0.17,3.51)                                     |         |

Continued on next page

Table B2 continued

| Variable                            | Category                | n    | Mortality risk<br>(95% CI) | Univariable analysis: Unadjusted odds ratio (uOR) |         | Multivariable analysis: Adjusted odds ratio (aOR) |         |
|-------------------------------------|-------------------------|------|----------------------------|---------------------------------------------------|---------|---------------------------------------------------|---------|
|                                     |                         |      |                            | Estimate<br>(95% CI)                              | p-value | Estimate<br>(95% CI)                              | p-value |
| Vaccination status <sup>3</sup>     | None (Ref)              | 8275 | 8.82 (8.22,9.45)           | -                                                 | 0.001   |                                                   | <0.001  |
|                                     | Early                   | 217  | 5.07 (2.56,8.89)           | 0.55 (0.28,0.97)                                  |         | 0.50 (0.25,0.92)                                  |         |
|                                     | Pfizer - 1 vaccine      | 79   | 8.86 (3.64,17.41)          | 1.00 (0.42,2.04)                                  |         | 0.40 (0.16,0.89)                                  |         |
|                                     | Primary                 | 104  | 0.96 (0.02,5.24)           | 0.10 (0.01,0.45)                                  |         | 0.10 (0.01,0.47)                                  |         |
| CD4 count (cells/ $\mu$ l)          | $\geq 500$ (Ref)        | 974  | 7.80 (6.20,9.67)           | -                                                 | <0.001  |                                                   | <0.001  |
|                                     | 200-499                 | 998  | 10.12 (8.32,12.16)         | 1.33 (0.98,1.82)                                  |         | 1.20 (0.86,1.68)                                  |         |
|                                     | 50-199                  | 502  | 14.74 (11.76,18.15)        | 2.04 (1.45,2.87)                                  |         | 1.82 (1.25,2.66)                                  |         |
|                                     | 0-49                    | 184  | 24.46 (18.43,31.32)        | 3.83 (2.53,5.74)                                  |         | 3.30 (2.04,5.31)                                  |         |
|                                     | Unknown                 | 6017 | 7.53 (6.87,8.22)           | 0.96 (0.75,1.25)                                  |         | 0.94 (0.72,1.24)                                  |         |
| Viral load <sup>4</sup> (copies/ml) | 0-999 (Ref)             | 6112 | 7.66 (7.00,8.35)           | -                                                 | <0.001  |                                                   | 0.546   |
|                                     | $\geq 1000$             | 570  | 12.63 (10.02,15.64)        | 1.74 (1.33,2.26)                                  |         | 1.08 (0.78,1.47)                                  |         |
|                                     | Unknown                 | 1183 | 7.27 (5.86,8.90)           | 0.95 (0.74,1.19)                                  |         | 0.89 (0.68,1.15)                                  |         |
| ART collection                      | Yes                     | 7865 | 7.96 (7.37,8.58)           | -                                                 | <0.001  |                                                   | 0.006   |
|                                     | No ART                  | 810  | 15.19 (12.78,17.84)        | 2.07 (1.67,2.54)                                  |         | 1.48 (1.12,1.94)                                  |         |
| HIV (years since first evidence)    | $\geq 1$ (Ref)          | 8164 | 8.06 (7.48,8.67)           | -                                                 | <0.001  |                                                   | 0.012   |
|                                     | < 1                     | 511  | 17.81 (14.59,21.41)        | 2.47 (1.93,3.13)                                  |         | 1.48 (1.08,2.01)                                  |         |
| Admission pressure <sup>5</sup> (%) | <25 (Ref)               | 2036 | 8.25 (7.09,9.53)           | -                                                 | 0.137   |                                                   | 0.932   |
|                                     | $\geq 25$ and <50       | 3183 | 9.43 (8.43,10.49)          | 1.16 (0.95,1.41)                                  |         | 0.99 (0.78,1.27)                                  |         |
|                                     | $\geq 50$               | 3456 | 8.13 (7.24,9.09)           | 0.98 (0.81,1.20)                                  |         | 0.95 (0.72,1.26)                                  |         |
| Wave                                | Wave 1 (Ref)            | 2731 | 9.34 (8.27,10.49)          | -                                                 | 0.286   |                                                   | 0.104   |
|                                     | Wave 2                  | 2505 | 8.58 (7.51,9.75)           | 0.91 (0.75,1.10)                                  |         | 0.96 (0.74,1.25)                                  |         |
|                                     | Wave 3                  | 2672 | 8.35 (7.32,9.46)           | 0.88 (0.73,1.07)                                  |         | 1.14 (0.89,1.46)                                  |         |
|                                     | Inter-waves             | 767  | 7.30 (5.56,9.38)           | 0.76 (0.56,1.03)                                  |         | 0.74 (0.51,1.06)                                  |         |
| District                            | City of Cape Town (Ref) | 5447 | 9.42 (8.66,10.22)          | -                                                 | 0.002   |                                                   | 0.231   |
|                                     | Cape Winelands          | 941  | 9.03 (7.28,11.05)          | 0.96 (0.75,1.21)                                  |         | 0.97 (0.74,1.26)                                  |         |
|                                     | Central Karoo           | 121  | 8.26 (4.03,14.67)          | 0.87 (0.42,1.58)                                  |         | 0.75 (0.35,1.47)                                  |         |
|                                     | Garden Route            | 1388 | 6.56 (5.31,7.99)           | 0.67 (0.53,0.85)                                  |         | 0.82 (0.64,1.05)                                  |         |
|                                     | Overberg                | 368  | 5.71 (3.57,8.59)           | 0.58 (0.36,0.89)                                  |         | 0.65 (0.39,1.03)                                  |         |
|                                     | West Coast              | 410  | 7.07 (4.79,10.00)          | 0.73 (0.49,1.06)                                  |         | 0.77 (0.50,1.14)                                  |         |

<sup>1</sup> Time since the most recent evidence of a start of an episode; with episodes beginning after 2 months before the SARS-CoV-2 diagnosis considered as ongoing. <sup>2</sup> Hypertension, diabetes, chronic obstructive pulmonary disease, chronic kidney disease, tuberculosis (at any time). <sup>3</sup> The highest level of protection from among: No vaccine received ('None'); <28 days since a first vaccine dose ('Early');  $\geq 28$  days since 1 dose of a Pfizer vaccine ('1 vaccine (P)');  $\geq 28$  days since 1 Janssen vaccine, possibly with a 2nd vaccine too, or  $\geq 14$  days since a 2nd Pfizer vaccine [(combined into the 'primary' series due to the small sample)]. <sup>4</sup> Among those with evidence of ART at any time. <sup>5</sup> The week's total number of COVID-19 admissions relative to the maximum weekly COVID-19 admissions for that district (as a percent). ART: Antiretroviral therapy. CI: Confidence interval.

## Supplemental Digital Content C: Adjusted odds ratios using alternative CD4 cell counts measures

**Table C1: Adjusted odds ratios (and 95% CIs) describing the association of mortality with a person's demographic characteristics, co-existing conditions, vaccination status, HIV characteristics and time/location covariates, using alternative CD4 cell count measures for 15–39-year-old adults with HIV and SARS-CoV-2 infections in the Western Cape**

| Variable                                | Category     | Adjusted odds ratio (aOR)                           |                                      |                                             |
|-----------------------------------------|--------------|-----------------------------------------------------|--------------------------------------|---------------------------------------------|
|                                         |              | Model 1:<br>Recent CD4<br>(AIC <sup>6</sup> : 2051) | Model 2:<br>CD4 nadir<br>(AIC: 2043) | Model 3:<br>CD4 at ART start<br>(AIC: 2062) |
| Sex                                     | Female (Ref) |                                                     |                                      |                                             |
|                                         | Male         | 1.07 (0.80,1.42)                                    | 1.04 (0.78,1.39)                     | 1.09 (0.81,1.45)                            |
| Age group (years)                       | 15-24 (Ref)  |                                                     |                                      |                                             |
|                                         | 25-29        | 1.21 (0.70,2.17)                                    | 1.15 (0.66,2.06)                     | 1.14 (0.66,2.03)                            |
|                                         | 30-34        | 1.37 (0.83,2.38)                                    | 1.30 (0.78,2.24)                     | 1.28 (0.78,2.22)                            |
|                                         | 35-39        | 2.05 (1.25,3.51)                                    | 1.88 (1.15,3.21)                     | 1.91 (1.17,3.27)                            |
| Hypertension                            | Absent (Ref) |                                                     |                                      |                                             |
|                                         | Present      | 1.68 (1.07,2.55)                                    | 1.70 (1.08,2.59)                     | 1.67 (1.06,2.53)                            |
| Diabetes                                | Absent (Ref) |                                                     |                                      |                                             |
|                                         | Present      | 2.64 (1.54,4.33)                                    | 2.56 (1.49,4.20)                     | 2.46 (1.44,4.01)                            |
| Chronic obstructive pulmonary disease   | Absent (Ref) |                                                     |                                      |                                             |
|                                         | Present      | 1.15 (0.62,1.98)                                    | 1.14 (0.62,1.97)                     | 1.18 (0.64,2.03)                            |
| Chronic kidney disease                  | Absent (Ref) |                                                     |                                      |                                             |
|                                         | Present      | 5.85 (2.93,11.06)                                   | 5.99 (3.01,11.31)                    | 5.79 (2.90,10.95)                           |
| Tuberculosis <sup>1</sup> (years since) | Absent (Ref) |                                                     |                                      |                                             |
|                                         | ≥ 1          | 1.73 (1.19,2.49)                                    | 1.50 (1.01,2.20)                     | 1.67 (1.14,2.42)                            |
|                                         | < 1          | 5.40 (3.43,8.41)                                    | 5.81 (3.71,8.99)                     | 7.48 (4.88,11.30)                           |
|                                         | Ongoing      | 7.40 (5.12,10.67)                                   | 7.58 (5.24,10.96)                    | 8.66 (6.06,12.36)                           |
| Number of conditions <sup>2</sup>       | 0-2 (Ref)    |                                                     |                                      |                                             |
|                                         | >2           | 0.62 (0.22,1.60)                                    | 0.61 (0.22,1.58)                     | 0.64 (0.23,1.65)                            |
| Pregnancy                               | Absent (Ref) |                                                     |                                      |                                             |
|                                         | Present      | 0.94 (0.51,1.63)                                    | 0.95 (0.51,1.64)                     | 0.98 (0.53,1.68)                            |
| Vaccination status <sup>3</sup>         | None (Ref)   |                                                     |                                      |                                             |
|                                         | Early        | 1.31 (0.31,3.80)                                    | 1.29 (0.30,3.71)                     | 1.18 (0.28,3.46)                            |
|                                         | 1/2 vaccines | 0.00 (0.00,0.29)                                    | 0.00 (0.00,0.00)                     | 0.00 (0.00,0.00)                            |
|                                         | ≥ 500 (Ref)  |                                                     |                                      |                                             |
| CD4 count (cells/μl)                    | 200-499      | 1.19 (0.67,2.17)                                    | 1.08 (0.67,1.84)                     | 0.90 (0.55,1.52)                            |
|                                         | 50-199       | 2.20 (1.23,4.04)                                    | 1.29 (0.76,2.25)                     | 1.41 (0.84,2.43)                            |
|                                         | 0-49         | 3.39 (1.83,6.47)                                    | 3.36 (1.95,5.98)                     | 1.60 (0.84,3.05)                            |
|                                         | Unknown      | 1.05 (0.64,1.80)                                    | 1.16 (0.63,2.17)                     | 0.63 (0.37,1.11)                            |
|                                         | 0-999 (Ref)  |                                                     |                                      |                                             |
| Viral load <sup>4</sup> (copies/ml)     | ≥ 1000       | 1.53 (1.03,2.24)                                    | 1.68 (1.15,2.43)                     | 2.11 (1.46,3.02)                            |
|                                         | Unknown      | 1.26 (0.88,1.81)                                    | 1.35 (0.94,1.93)                     | 1.43 (1.00,2.04)                            |
|                                         | Yes          |                                                     |                                      |                                             |
| ART collection                          | No ART       | 2.30 (1.47,3.54)                                    | 2.33 (1.45,3.66)                     | 3.32 (1.97,5.62)                            |
|                                         | ≥ 1 (Ref)    |                                                     |                                      |                                             |
| HIV (years since first evidence)        | < 1          | 1.37 (0.91,2.05)                                    | 1.48 (0.96,2.24)                     | 1.33 (0.88,1.99)                            |

Continued on next page



Table C1 continued

| Variable                            | Category                | Adjusted odds ratio (aOR)                           |                                      |                                             |
|-------------------------------------|-------------------------|-----------------------------------------------------|--------------------------------------|---------------------------------------------|
|                                     |                         | Model 1:<br>Recent CD4<br>(AIC <sup>6</sup> : 2051) | Model 2:<br>CD4 nadir<br>(AIC: 2043) | Model 3:<br>CD4 at ART start<br>(AIC: 2062) |
| Admission pressure <sup>5</sup> (%) | <25 (Ref)               |                                                     |                                      |                                             |
|                                     | ≥25 and <50             | 1.65 (1.11,2.49)                                    | 1.68 (1.13,2.53)                     | 1.66 (1.12,2.51)                            |
|                                     | ≥50                     | 1.24 (0.79,2.00)                                    | 1.30 (0.82,2.09)                     | 1.25 (0.80,2.01)                            |
| Wave                                | Wave 1 (Ref)            |                                                     |                                      |                                             |
|                                     | Wave 2                  | 1.29 (0.82,2.01)                                    | 1.27 (0.81,1.99)                     | 1.31 (0.83,2.04)                            |
|                                     | Wave 3                  | 1.68 (1.13,2.50)                                    | 1.71 (1.15,2.54)                     | 1.66 (1.11,2.47)                            |
|                                     | Inter-waves             | 1.83 (1.08,3.11)                                    | 1.81 (1.07,3.07)                     | 1.88 (1.11,3.19)                            |
| District                            | City of Cape Town (Ref) |                                                     |                                      |                                             |
|                                     | Cape Winelands          | 1.70 (1.12,2.52)                                    | 1.70 (1.12,2.54)                     | 1.71 (1.12,2.54)                            |
|                                     | Central Karoo           | 0.50 (0.08,1.75)                                    | 0.55 (0.09,1.88)                     | 0.51 (0.08,1.77)                            |
|                                     | Garden Route            | 0.95 (0.64,1.37)                                    | 0.94 (0.64,1.37)                     | 0.96 (0.65,1.39)                            |
|                                     | Overberg                | 1.37 (0.76,2.32)                                    | 1.38 (0.77,2.34)                     | 1.31 (0.73,2.21)                            |
|                                     | West Coast              | 0.94 (0.45,1.75)                                    | 0.93 (0.45,1.73)                     | 0.96 (0.46,1.80)                            |

<sup>1</sup> Time since the most recent evidence of a start of an episode; with episodes beginning after 2 months before the SARS-CoV-2 diagnosis considered as ongoing. <sup>2</sup> Hypertension, diabetes, chronic obstructive pulmonary disease, chronic kidney disease, tuberculosis (at any time).

<sup>3</sup> The highest level of protection from among: No vaccine received ('None'); <28 days since a first vaccine dose ('Early'); ≥28 days since (at least) a first dose of a vaccine (1 or 2 Pfizer or Janssen vaccines not distinguished due to small samples). <sup>4</sup> Among those with evidence of ART at any time. <sup>5</sup> The week's total number of COVID-19 admissions relative to the maximum weekly COVID-19 admissions for that district (as a percent). <sup>6</sup> Akaike Information Criterion (AIC) provides relative measure of models' predictive powers; lower AIC values are more favourable.

ART: Antiretroviral therapy. CI: Confidence interval.

**Table C2: Adjusted odds ratios (and 95% CIs) describing the association of mortality with a person's demographic characteristics, co-existing conditions, vaccination status, HIV characteristics and time/location covariates, using alternative CD4 cell count measures, for adults with HIV and SARS-CoV-2 infections  $\geq 40$  years old in the Western Cape**

| Variable                                | Category           | Adjusted odds ratio (aOR)                           |                                      |                                             |
|-----------------------------------------|--------------------|-----------------------------------------------------|--------------------------------------|---------------------------------------------|
|                                         |                    | Model 1:<br>Recent CD4<br>(AIC <sup>6</sup> : 4465) | Model 2:<br>CD4 nadir<br>(AIC: 4470) | Model 3:<br>CD4 at ART start<br>(AIC: 4489) |
| Sex                                     | Female (Ref)       |                                                     |                                      |                                             |
|                                         | Male               | 1.31 (1.11,1.54)                                    | 1.30 (1.10,1.53)                     | 1.33 (1.13,1.57)                            |
| Age group (years)                       | 40-49 (Ref)        |                                                     |                                      |                                             |
|                                         | 50-59              | 1.73 (1.43,2.09)                                    | 1.71 (1.42,2.06)                     | 1.67 (1.39,2.02)                            |
|                                         | 60-69              | 3.34 (2.61,4.26)                                    | 3.44 (2.68,4.39)                     | 3.27 (2.56,4.17)                            |
|                                         | 70+                | 4.89 (3.35,7.07)                                    | 4.99 (3.41,7.24)                     | 4.62 (3.16,6.68)                            |
| Hypertension                            | Absent (Ref)       |                                                     |                                      |                                             |
|                                         | Present            | 1.22 (1.01,1.48)                                    | 1.23 (1.02,1.49)                     | 1.22 (1.01,1.48)                            |
| Diabetes                                | Absent (Ref)       |                                                     |                                      |                                             |
|                                         | Present            | 3.12 (2.54,3.83)                                    | 3.14 (2.56,3.86)                     | 3.04 (2.48,3.73)                            |
| Chronic obstructive pulmonary disease   | Absent (Ref)       |                                                     |                                      |                                             |
|                                         | Present            | 1.04 (0.80,1.35)                                    | 1.09 (0.84,1.41)                     | 1.09 (0.84,1.41)                            |
| Chronic kidney disease                  | Absent (Ref)       |                                                     |                                      |                                             |
|                                         | Present            | 2.47 (1.89,3.21)                                    | 2.49 (1.91,3.23)                     | 2.52 (1.93,3.27)                            |
| Tuberculosis <sup>1</sup> (years since) | Absent (Ref)       |                                                     |                                      |                                             |
|                                         | 12m+               | 1.26 (1.02,1.54)                                    | 1.18 (0.96,1.45)                     | 1.24 (1.01,1.52)                            |
|                                         | <12m               | 2.31 (1.54,3.42)                                    | 2.68 (1.80,3.93)                     | 2.93 (1.96,4.28)                            |
|                                         | Recent/current     | 3.37 (2.46,4.59)                                    | 3.66 (2.69,4.96)                     | 4.07 (2.99,5.49)                            |
| Number of conditions <sup>2</sup>       | 0-2 (Ref)          |                                                     |                                      |                                             |
|                                         | >2                 | 0.74 (0.53,1.03)                                    | 0.75 (0.54,1.04)                     | 0.75 (0.54,1.04)                            |
| Pregnancy                               | Absent (Ref)       |                                                     |                                      |                                             |
|                                         | Present            | 1.06 (0.17,3.51)                                    | 1.14 (0.18,3.74)                     | 1.11 (0.18,3.65)                            |
| Vaccination status <sup>3</sup>         | None (Ref)         |                                                     |                                      |                                             |
|                                         | Early              | 0.50 (0.25,0.92)                                    | 0.49 (0.24,0.90)                     | 0.49 (0.24,0.90)                            |
|                                         | Pfizer - 1 vaccine | 0.40 (0.16,0.89)                                    | 0.41 (0.16,0.89)                     | 0.41 (0.16,0.90)                            |
|                                         | Primary            | 0.10 (0.01,0.47)                                    | 0.10 (0.01,0.48)                     | 0.09 (0.01,0.44)                            |
| CD4 count (cells/ $\mu$ l)              | $\geq 500$ (Ref)   |                                                     |                                      |                                             |
|                                         | 200-499            | 1.20 (0.86,1.68)                                    | 1.37 (1.02,1.86)                     | 1.07 (0.74,1.57)                            |
|                                         | 50-199             | 1.82 (1.25,2.66)                                    | 1.50 (1.11,2.07)                     | 1.37 (0.95,2.01)                            |
|                                         | 0-49               | 3.30 (2.04,5.31)                                    | 2.36 (1.65,3.38)                     | 2.11 (1.36,3.32)                            |
|                                         | Unknown            | 0.94 (0.72,1.24)                                    | 0.79 (0.53,1.19)                     | 1.21 (0.85,1.76)                            |
| Viral load <sup>4</sup> (copies/ml)     | 0-999 (Ref)        |                                                     |                                      |                                             |
|                                         | $\geq 1000$        | 1.08 (0.78,1.47)                                    | 1.34 (0.99,1.79)                     | 1.45 (1.08,1.93)                            |
|                                         | Unknown            | 0.89 (0.68,1.15)                                    | 1.03 (0.79,1.34)                     | 0.94 (0.73,1.21)                            |
| ART collection                          | Yes                |                                                     |                                      |                                             |
|                                         | No ART             | 1.48 (1.12,1.94)                                    | 1.80 (1.32,2.43)                     | 1.40 (1.03,1.88)                            |
| HIV (years since first evidence)        | $\geq 1$ (Ref)     |                                                     |                                      |                                             |
|                                         | < 1                | 1.48 (1.08,2.01)                                    | 1.87 (1.35,2.57)                     | 1.57 (1.15,2.14)                            |

Continued on next page

Table C2 continued

| Variable                            | Category                | Adjusted odds ratio (aOR)                           |                                      |                                             |
|-------------------------------------|-------------------------|-----------------------------------------------------|--------------------------------------|---------------------------------------------|
|                                     |                         | Model 1:<br>Recent CD4<br>(AIC <sup>6</sup> : 4465) | Model 2:<br>CD4 nadir<br>(AIC: 4470) | Model 3:<br>CD4 at ART start<br>(AIC: 4489) |
| Admission pressure <sup>5</sup> (%) | <25 (Ref)               |                                                     |                                      |                                             |
|                                     | ≥25 and <50             | 0.99 (0.78,1.27)                                    | 0.98 (0.77,1.26)                     | 1.00 (0.78,1.28)                            |
|                                     | ≥50                     | 0.95 (0.72,1.26)                                    | 0.95 (0.72,1.26)                     | 0.95 (0.72,1.26)                            |
| Wave                                | Wave 1 (Ref)            |                                                     |                                      |                                             |
|                                     | Wave 2                  | 0.96 (0.74,1.25)                                    | 0.97 (0.74,1.26)                     | 0.98 (0.75,1.27)                            |
|                                     | Wave 3                  | 1.14 (0.89,1.46)                                    | 1.15 (0.90,1.48)                     | 1.18 (0.91,1.51)                            |
|                                     | Inter-waves             | 0.74 (0.51,1.06)                                    | 0.72 (0.50,1.04)                     | 0.75 (0.52,1.09)                            |
| District                            | City of Cape Town (Ref) |                                                     |                                      |                                             |
|                                     | Cape Winelands          | 0.97 (0.74,1.26)                                    | 1.01 (0.77,1.31)                     | 1.00 (0.76,1.30)                            |
|                                     | Central Karoo           | 0.75 (0.35,1.47)                                    | 0.81 (0.37,1.57)                     | 0.79 (0.36,1.54)                            |
|                                     | Garden Route            | 0.82 (0.64,1.05)                                    | 0.84 (0.65,1.07)                     | 0.82 (0.64,1.05)                            |
|                                     | Overberg                | 0.65 (0.39,1.03)                                    | 0.66 (0.40,1.05)                     | 0.67 (0.40,1.06)                            |
|                                     | West Coast              | 0.77 (0.50,1.14)                                    | 0.79 (0.52,1.18)                     | 0.80 (0.52,1.18)                            |

<sup>1</sup> Time since the most recent evidence of a start of an episode; with episodes beginning after 2 months before the SARS-CoV-2 diagnosis considered as ongoing. <sup>2</sup> Hypertension, diabetes, chronic obstructive pulmonary disease, chronic kidney disease, tuberculosis (at any time). <sup>3</sup> The highest level of protection from among: No vaccine received ('None'); <28 days since a first vaccine dose ('Early'); ≥28 days since 1 dose of a Pfizer vaccine ('1 vaccine(P)'); ≥28 days since 1 Janssen vaccine, possibly with a 2nd vaccine too, or ≥14 days since a 2nd Pfizer vaccine [(combined into the 'primary' series due to the small sample)]. <sup>4</sup> Among those with evidence of ART at any time. <sup>5</sup> The week's total number of COVID-19 admissions relative to the maximum weekly COVID-19 admissions for that district (as a percent). <sup>6</sup> Akaike Information Criterion (AIC) provides relative measure of models' predictive powers; lower AIC values are more favourable. ART: Antiretroviral therapy. CI: Confidence interval.

## Supplemental Digital Content D: Adjusted odds ratios for models including SARS-CoV-2 infections diagnosed during Wave 4

**Figure D1: Adjusted odds ratios (and 95% CIs) describing the association of mortality with a person's HIV characteristics, vaccination, demographic characteristics, and co-existing conditions, for 15–39-year-old adults with HIV and SARS-CoV-2 infections in the Western Cape using all infections until 10 March 2022. P-values are reported on the right.**

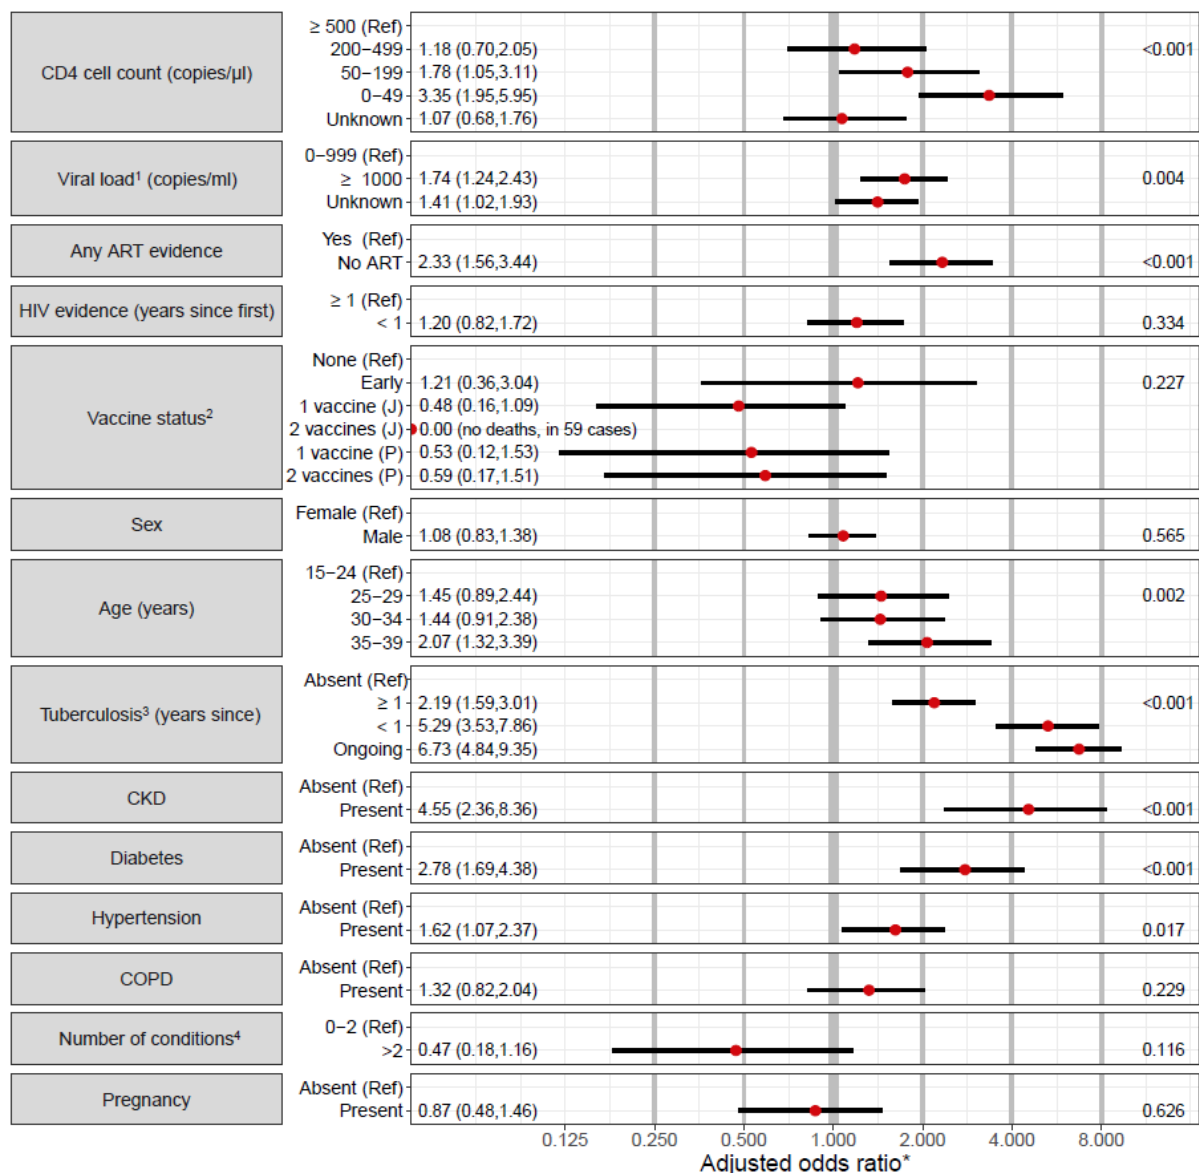

\* Also adjusted for district, wave, admission pressure

<sup>1</sup> Among those with evidence of ART at any time. <sup>2</sup> The highest level of protection from among six categories: No vaccine received ('None'); <28 days since a first vaccine dose ('Early');  $\geq 28$  days since a first dose of a vaccine, by type ('1 vaccine'); or  $\geq 14$  days since a second dose, by type ('2 vaccines'). J: Janssen, P: Pfizer. <sup>3</sup> Time since the most recent evidence of a start of an episode; with episodes beginning after 2 months before the SARS-CoV-2 diagnosis considered as ongoing. <sup>4</sup> Hypertension, diabetes, chronic obstructive pulmonary disease, chronic kidney disease, tuberculosis (at any time).

ART: Antiretroviral therapy. CI: Confidence interval. CKD: Chronic kidney disease. COPD: Chronic obstructive pulmonary disease.

**Figure D2: Adjusted odds ratios (and 95% CIs) describing the association of mortality with a person's HIV characteristics, vaccination, demographic characteristics, and co-existing conditions, for adults with HIV and SARS-CoV-2 infections aged ≥ 40 years in the Western Cape using all infections until 10 March 2022. P-values are reported on the right.**

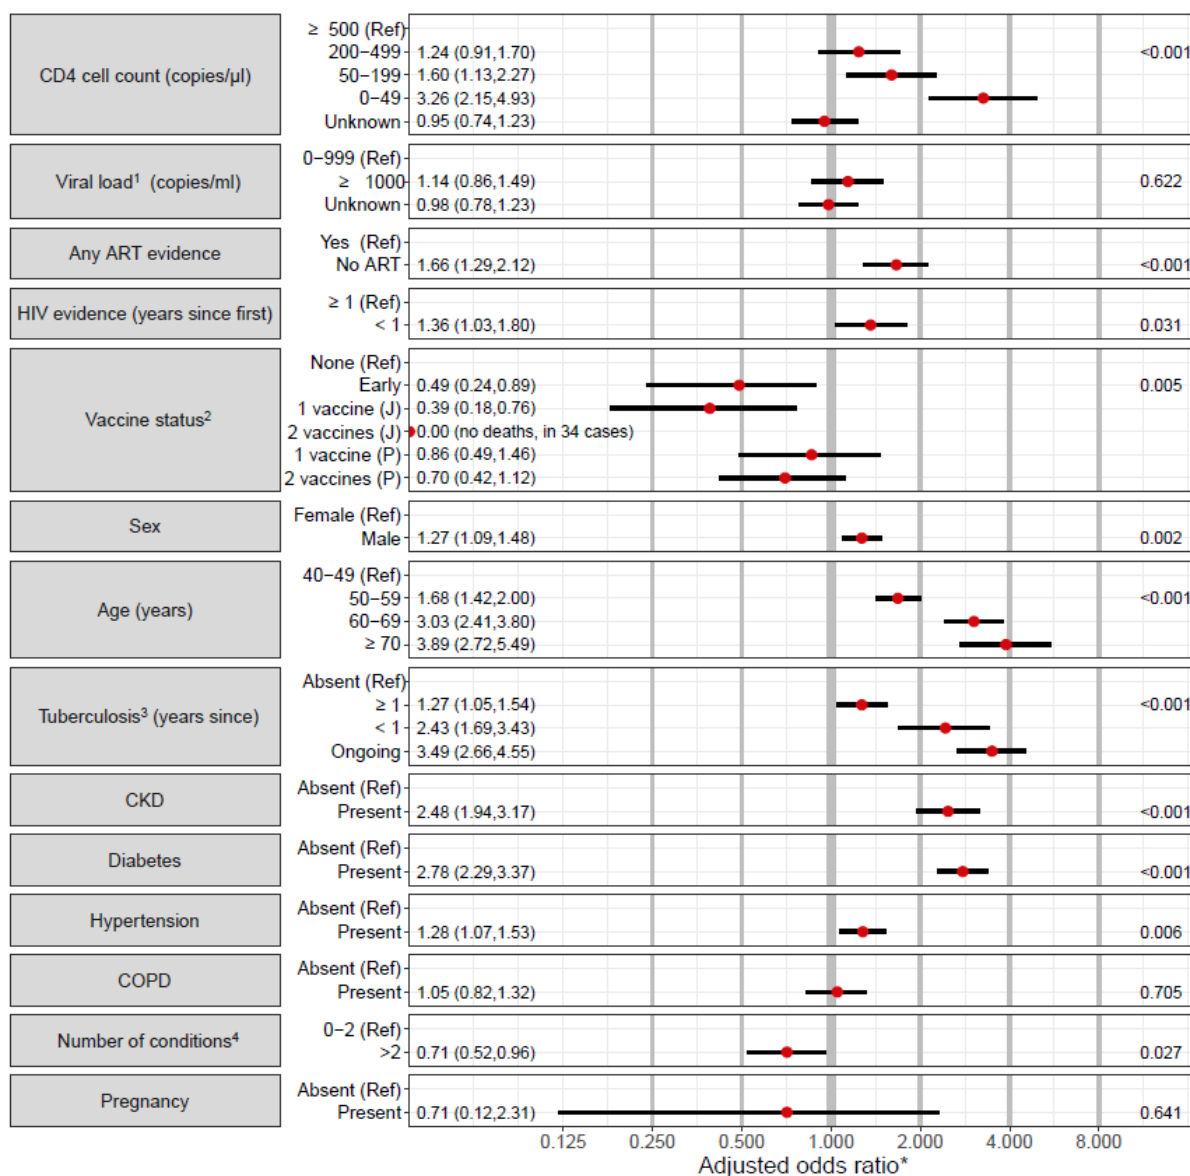

\* Also adjusted for district, wave, admission pressure.

<sup>1</sup> Among those with evidence of ART at any time. <sup>2</sup> The highest level of protection from among six categories: No vaccine received ('None'); <28 days since a first vaccine dose ('Early'); ≥28 days since a first dose of a vaccine, by type ('1 vaccine'); or ≥14 days since a second dose, by type ('2 vaccines'). J: Janssen, P: Pfizer. <sup>3</sup> Time since the most recent evidence of a start of an episode; with episodes beginning after 2 months before the SARS-CoV-2 diagnosis considered as ongoing. <sup>4</sup> Hypertension, diabetes, chronic obstructive pulmonary disease, chronic kidney disease, tuberculosis (at any time).

ART: Antiretroviral therapy. CI: Confidence interval. CKD: Chronic kidney disease. COPD: Chronic obstructive pulmonary disease.
